# Supplementary material for: Quality of life of older adults and associated factors in Ghanaian urban slums: a cross-sectional study
Source: HighWire-hosted journal article supplement (doi:10.1136/bmjopen-2021-057264), 2022-02-01
Supplement: bmjopen-2021-057264supp001_data_supplement.pdf [file bmjopen-2021-057264supp001_data_supplement.pdf]

**Appendix:Table 1: Background characteristics of participants by residence**

| Characteristics             | Teshie    | Ashaiman  | Total n (%) |
|-----------------------------|-----------|-----------|-------------|
| <b>Gender</b>               |           |           |             |
| Male                        | 43(21.6)  | 114(57.6) | 157(39.5)   |
| Female                      | 156(78.4) | 84(42.4)  | 240(60.5)   |
| <b>Age group (in years)</b> |           |           |             |
| 60-65                       | 90(45.2)  | 99(50.0)  | 189(47.6)   |
| 66-70                       | 36(18.1)  | 39(19.7)  | 75(18.9)    |
| 71-75                       | 32(16.1)  | 23(11.6)  | 55(13.9)    |
| 76-80                       | 18(9.0)   | 20(10.1)  | 38(9.6)     |
| >81                         | 23(11.6)  | 17(8.6)   | 40(10.1)    |
| <b>Marital Status</b>       |           |           |             |
| Single                      | 28(14.1)  | 9(4.5)    | 37(9.3)     |
| Married                     | 41(20.6)  | 85(42.9)  | 126(31.7)   |
| Divorced                    | 25(12.6)  | 56(28.3)  | 81(20.4)    |
| Widowed                     | 105(52.7) | 48(24.3)  | 153(38.5)   |
| <b>Education</b>            |           |           |             |
| No formal                   | 82(41.2)  | 96(48.5)  | 178(44.8)   |
| Elementary                  | 38(19.1)  | 56(28.3)  | 94(23.7)    |
| High School                 | 73(36.7)  | 24(12.1)  | 97(24.4)    |
| Above High School           | 6(3.0)    | 22(11.1)  | 28(7.1)     |

Appendix: Table 2: Associated factors

| Characteristics                 | Frequency | %    |
|---------------------------------|-----------|------|
| <b>Current Illness</b>          |           |      |
| Body Pains                      | 76        | 19.2 |
| Diabetes                        | 19        | 4.8  |
| Difficulty Walking              | 33        | 8.3  |
| High Blood Pressure             | 68        | 17.1 |
| Joint Pains                     | 100       | 25.2 |
| Old Age                         | 26        | 6.5  |
| Poor EyeSight                   | 43        | 10.8 |
| Others                          | 32        | 8.1  |
| <b>Sources of Income</b>        |           |      |
| Children                        | 125       | 31.5 |
| Farming                         | 38        | 9.6  |
| Fishing                         | 52        | 13.1 |
| Friends                         | 37        | 9.3  |
| Pension                         | 27        | 6.8  |
| Siblings                        | 19        | 4.7  |
| Trading                         | 91        | 22.9 |
| Others                          | 8         | 2.0  |
| <b>Source of healthcare</b>     |           |      |
| Clinic                          | 63        | 15.9 |
| Drug Ped                        | 37        | 9.3  |
| Herbalist                       | 18        | 4.5  |
| Hospital                        | 121       | 30.5 |
| Pharmacy                        | 158       | 39.8 |
| <b>Source of Social Support</b> |           |      |
| Sibling                         | 69        | 17.4 |
| Daughter                        | 114       | 28.7 |
| Son                             | 67        | 16.9 |
| Grandchild                      | 44        | 11.1 |
| Other                           | 21        | 5.3  |

**Appendix: Table 3: Participants Mean scores and Association of background characteristics with QoL scores**

|                       | General<br>QoL | General<br>Health | Psychological<br>domain ** | Physical<br>domain** | Social<br>domain** | Environmental<br>domain** |
|-----------------------|----------------|-------------------|----------------------------|----------------------|--------------------|---------------------------|
| Total group (n=397)   | 2.73           | 2.90              | 45.07 <sup>b</sup>         | 43.25 <sup>a</sup>   | 56.97 <sup>b</sup> | 51.63 <sup>b</sup>        |
| <b>Gender</b>         |                |                   |                            |                      |                    |                           |
| Female                | 2.53           | 2.78              | 41.95 <sup>a</sup>         | 44.63 <sup>a</sup>   | 56.44 <sup>b</sup> | 49.21 <sup>b</sup>        |
| Male                  | 3.04           | 3.09              | 45.22 <sup>b</sup>         | 45.75 <sup>b</sup>   | 57.77 <sup>b</sup> | 55.30 <sup>b</sup>        |
| Mean difference       | .515           | .310              | 3.27                       | 1.11                 | 1.33               | 6.09                      |
| p-value               | .000*          | .017*             | .019*                      | .611                 | .506               | .001*                     |
| <b>Age group</b>      |                |                   |                            |                      |                    |                           |
| 60-65 years           | 2.08           | 2.98              | 45.44                      | 49.14                | 57.11              | 54.41                     |
| 66-70 years           | 2.84           | 3.04              | 41.89                      | 43.65                | 58.48              | 51.69                     |
| 71-75 years           | 2.80           | 2.95              | 40.31                      | 42.49                | 57.47              | 49.75                     |
| 76-80 years           | 2.58           | 2.66              | 42.34                      | 40.11                | 53.97              | 48.95                     |
| >80 years             | 2.25           | 2.45              | 40.30                      | 36.89                | 55.60              | 43.26                     |
| F                     | 2.139          | 1.966             | 2.600                      | 4.180                | .397               | 4.111                     |
| p-value               | .075           | .099              | .036*                      | .003*                | .811               | .003*                     |
| <b>Marital status</b> |                |                   |                            |                      |                    |                           |
| Single                | 2.43           | 2.54              | 35.97                      | 37.46                | 48.41              | 46.89                     |
| Married               | 3.00           | 3.02              | 47.44                      | 47.66                | 62.18              | 56.13                     |
| Divorced              | 2.95           | 2.95              | 44.52                      | 46.05                | 49.57              | 52.34                     |
| Widowed               | 2.47           | 2.86              | 40.88                      | 44.27                | 58.66              | 48.69                     |
| F                     | 6.370          | 1.420             | 9.861                      | 2.359                | 10.385             | 5.583                     |
| p-value               | .000*          | .237              | .000*                      | .071                 | .000*              | .001*                     |
| <b>Education</b>      |                |                   |                            |                      |                    |                           |
| No formal education   | 2.61           | 2.66              | 39.51                      | 40.73                | 54.76              | 47.71                     |
| Elementary school     | 2.78           | 2.96              | 45.81                      | 46.73                | 57.63              | 52.19                     |
| High school           | 2.72           | 3.14              | 45.02                      | 50.23                | 58.60              | 54.41                     |
| Above high school     | 3.39           | 3.43              | 52.25                      | 49.25                | 63.14              | 64.86                     |
| F                     | 3.498          | 4.990             | 10.938                     | 5.084                | 1.982              | 10.241                    |
| p-value               | .016*          | .002*             | .000*                      | .002*                | .116               | .000*                     |
| <b>Residence</b>      |                |                   |                            |                      |                    |                           |
| Teshie slum           | 2.29           | 2.87              | 41.28                      | 45.99                | 58.19              | 47.59                     |
| Ashaiman slum         | 3.18           | 2.93              | 45.22                      | 44.15                | 55.74              | 55.71                     |
| Mean difference       | -.885          | -.065             | -3.94                      | 1.84                 | 2.44               | -8.12                     |

|                                 |       |       |       |       |       |       |
|---------------------------------|-------|-------|-------|-------|-------|-------|
| p-value                         | .000* | .618  | .004* | .389  | .211  | .000* |
| <b>Sources of Income</b>        |       |       |       |       |       |       |
| Pension                         | 3.04  | 3.33  | 44.96 | 50.96 | 56.52 | 53.56 |
| Fishing/Farming                 | 2.76  | 2.81  | 42.39 | 44.00 | 56.09 | 49.47 |
| Trading                         | 2.48  | 2.58  | 41.75 | 41.47 | 54.55 | 49.74 |
| Children                        | 2.86  | 3.06  | 44.88 | 44.79 | 58.49 | 53.22 |
| Friends                         | 2.65  | 3.24  | 41.97 | 49.92 | 59.27 | 52.62 |
| Family/Siblings                 | 2.90  | 3.05  | 46.35 | 50.70 | 59.10 | 55.45 |
| Other                           | 2.25  | 1.75  | 37.00 | 46.13 | 56.25 | 51.75 |
| F                               | 1.500 | 3.434 | 1.118 | 1.389 | .518  | .842  |
| p-value                         | .177  | .003* | .351  | .218  | .794  | .538  |
| <b>Source of Social Support</b> |       |       |       |       |       |       |
| Sibling                         | 2.72  | 2.88  | 44.06 | 43.62 | 53.35 | 52.93 |
| Daughter                        | 2.61  | 2.74  | 42.73 | 42.21 | 57.16 | 49.07 |
| Son                             | 2.84  | 3.07  | 42.52 | 48.87 | 58.03 | 54.09 |
| Grandchild                      | 2.66  | 2.68  | 41.86 | 44.61 | 55.18 | 50.64 |
| Other                           | 2.86  | 3.38  | 47.05 | 53.95 | 62.19 | 53.48 |
| F                               | .481  | 1.761 | .695  | 2.134 | 1.049 | 1.192 |
| p-value                         | .749  | .137  | .596  | .076  | .382  | .314  |
| <b>Living Arrangements</b>      |       |       |       |       |       |       |
| Extended family                 | 3.10  | 3.10  | 45.15 | 46.28 | 56.92 | 54.59 |
| Family                          | 2.45  | 2.60  | 42.87 | 36.08 | 56.57 | 48.70 |
| Alone                           | 2.41  | 2.81  | 40.27 | 47.21 | 55.96 | 49.36 |
| Children                        | 2.91  | 2.96  | 45.37 | 46.62 | 58.53 | 52.18 |
| Others                          | 2.50  | 2.70  | 45.10 | 37.80 | 62.40 | 54.33 |
| F                               | 7.080 | 1.72  | 2.747 | 3.275 | .396  | 2.067 |
| p-value                         | .000* | .144  | .028* | .012* | .811  | .084  |

\*\*All raw scores are transformed to a 1-100 score, \*Significant p-value  $\leq 0.05$ , <sup>a</sup> =poor QoL, <sup>b</sup> = moderate QoL

**Appendix: Table 4: ANOVA for Regression analysis showing the influence of demographic characteristics and Participants QoL in the 4 domains of the WHOQOL-BREF**

|                            | Psychological domain<br>Mean | Physical domain<br>Mean   | Social domain<br>Mean     | Environment:<br>Mean      |
|----------------------------|------------------------------|---------------------------|---------------------------|---------------------------|
| Total group<br>(n=397)     | 45.07                        | 43.25                     | 56.97                     | 51.63                     |
| <b>Gender</b>              |                              |                           |                           |                           |
| Female                     | 41.95                        | 44.63                     | 56.44                     | 49.21                     |
| <i>Difference in means</i> | $F(3,235)=36.118; p<.001$    | $F(3,235)=28.856; p<.001$ | $F(3,235)=12.619; p<.001$ | $F(3,235)=46.619; p<.001$ |
| <i>Adjusted R square</i>   | .307                         | .260                      | .128                      | .363                      |
| Male                       | 45.22                        | 45.75                     | 57.77                     | 55.30                     |
| <i>Difference in means</i> | $F(3,153)=76.702; p<.001$    | $F(3,153)=31.965; p<.001$ | $F(3,153)=26.887; p<.001$ | $F(3,153)=73.153; p<.001$ |
| <i>Adjusted R square</i>   | .593                         | .373                      | .345                      | .583                      |
| <b>Age group</b>           |                              |                           |                           |                           |
| 60-65 years                | 45.44                        | 49.14                     | 57.11                     | 54.41                     |
| <i>Difference in means</i> | $F(3,185)=56.458; p<.001$    | $F(3,185)=25.285; p<.001$ | $F(3,185)=17.656; p<.001$ | $F(3,185)=60.185; p<.001$ |
| <i>Adjusted R square</i>   | .469                         | .279                      | .210                      | .488                      |
| 66-70 years                | 41.89                        | 43.65                     | 58.48                     | 51.69                     |
| <i>Difference in means</i> | $F(3,71)=14.223; p<.001$     | $F(3,71)=12.154; p<.001$  | $F(3,71)=6.713; p<.001$   | $F(3,71)=16.371; p<.001$  |
| <i>Adjusted R square</i>   | .349                         | .311                      | .188                      | .383                      |
| 71-75 years                | 40.31                        | 42.49                     | 57.47                     | 49.75                     |
| <i>Difference in means</i> | $F(3,51)=12.850; p<.001$     | $F(3,51)=5.413; p=.003$   | $F(3,51)=2.143; p=.106$   | $F(3,51)=15.951; p<.001$  |
| <i>Adjusted R square</i>   | .397                         | .197                      | .112                      | .453                      |
| 76-80 years                | 42.34                        | 40.11                     | 53.97                     | 48.95                     |
| <i>Difference in means</i> | $F(3,34)=7.977; p<.001$      | $F(3,34)=2.285; p=.096$   | $F(3,34)=12.850; p=.002$  | $F(3,34)=6.295; p<.001$   |
| <i>Adjusted R square</i>   | .361                         | .094                      | .288                      | .300                      |
| >80 years                  | 40.30                        | 36.89                     | 55.60                     | 43.26                     |
| <i>Difference in means</i> | $F(3,35)=13.315; p<.001$     | $F(3,35)=11.896; p<.001$  | $F(3,35)=7.288; p=.001$   | $F(3,35)=10.735; p<.001$  |
| <i>Adjusted R square</i>   | .493                         | .462                      | .332                      | .435                      |
| <b>Marital status</b>      |                              |                           |                           |                           |
| Single                     | 35.97                        | 37.46                     | 48.41                     | 46.89                     |
| <i>Difference in means</i> | $F(3,33)=13.087; p<.001$     | $F(3,33)=3.797; p=.019$   | $F(3,33)=1.971; p=.137$   | $F(3,33)=17.133; p<.001$  |
| <i>Adjusted R square</i>   | .502                         | .189                      | .075                      | .573                      |
| Married                    | 47.44                        | 47.66                     | 62.18                     | 56.13                     |
| <i>Difference in means</i> | $F(3,122)=47.457; p<.001$    | $F(3,122)=18.805; p<.001$ | $F(3,122)=32.156; p<.001$ | $F(3,122)=49.122; p<.001$ |
| <i>Adjusted R square</i>   | .527                         | .299                      | .428                      | .538                      |
| Divorced                   | 44.52                        | 46.05                     | 49.57                     | 52.34                     |
| <i>Difference in means</i> | $F(3,76)=30.952; p<.001$     | $F(3,76)=18.004; p<.001$  | $F(3,76)=9.245; p<.001$   | $F(3,76)=39.476; p<.001$  |
| <i>Adjusted R square</i>   | .532                         | .392                      | .238                      | .593                      |
| Widowed                    | 40.88                        | 44.27                     | 58.66                     | 48.69                     |
| <i>Difference in means</i> | $F(3,76)=18.283; p<.001$     | $F(3,149)=20.969; p<.001$ | $F(3,149)=8.231; p<.001$  | $F(3,149)=25.149; p<.001$ |
| <i>Adjusted R square</i>   | .254                         | .283                      | .125                      | .330                      |
| <b>Education</b>           |                              |                           |                           |                           |
| <b>No formal education</b> | 39.51                        | 40.73                     | 54.76                     | 47.71                     |
| <i>Difference in means</i> | $F(3,173)=36.902; p<.001$    | $F(3,173)=25.547; p<.001$ | $F(3,173)=16.669; p<.001$ | $F(3,173)=50.173; p<.001$ |
| <i>Adjusted R square</i>   | .380                         | .295                      | .211                      | .457                      |
| <b>Elementary school</b>   | 45.81                        | 46.73                     | 57.63                     | 52.19                     |
| <i>Difference in means</i> | $F(3,90)=32.867; p<.001$     | $F(3,90)=20.298; p<.001$  | $F(3,90)=11.102; p<.001$  | $F(3,90)=24.790; p<.001$  |
| <i>Adjusted R square</i>   | .507                         | .384                      | .246                      | .433                      |
| <b>High school</b>         | 45.02                        | 50.23                     | 58.60                     | 54.41                     |
| <i>Difference in means</i> | $F(3,93)=16.478; p<.001$     | $F(3,93)=10.946; p<.001$  | $F(3,93)=3.902; p=.011$   | $F(3,93)=21.993; p<.001$  |
| <i>Adjusted R square</i>   | .326                         | .237                      | .083                      | .396                      |

|                            |                            |                           |                           |                |
|----------------------------|----------------------------|---------------------------|---------------------------|----------------|
| <b>Above high school</b>   | 52.25                      | 49.25                     | 63.14                     | 64.86          |
| <i>Difference in means</i> | $F(3,24)=11.757; p<.001$   | $F(3,24)=4.401; p=.013$   | $F(3,24)=7.112; p=.001$   | $F(3,24)=4.33$ |
| <i>Adjusted R square</i>   | .544                       | .274                      | .404                      | .270           |
| <b>Residence</b>           |                            |                           |                           |                |
| Teshie slum                | 41.28                      | 45.99                     | 58.19                     | 47.59          |
| <i>Difference in means</i> | $F(3,195)=11.276; p<.001$  | $F(3,195)=28.819; p<.001$ | $F(3,195)=6.570; p<.001$  | $F(3,195)=34.$ |
| <i>Adjusted R square</i>   | .135                       | .297                      | .078                      | .339           |
| Ashaiman slum              | 45.22                      | 44.15                     | 55.74                     | 55.71          |
| <i>Difference in means</i> | $F(3,193)=171.779; p<.001$ | $F(3,193)=56.292; p<.001$ | $F(3,193)=47.252; p<.001$ | $F(3,193)=11.$ |
| <i>Adjusted R square</i>   | .723                       | .458                      | .414                      | .644           |
